# Supplementary material for: Template-engaged synthesis of uniform mesoporous hollow NiCo2O4 sub-microspheres towards high-performance electrochemical capacitors
Source: Royal Society of Chemistry journal article supplement (doi:10.1039/c3ra42828a), 2013-01-01
Supplement: c3ra42828a.pdf [file c3ra42828a.pdf]

## Supporting Information

### **Template-engaged synthesis of Uniform mesoporous hollow $\text{NiCo}_2\text{O}_4$ sub-microspheres towards high-performance electrochemical capacitors**

*By Changzhou Yuan,\*<sup>a</sup> Jiaoyang Li,<sup>a</sup> Linrui Hou,<sup>a</sup> Jingdong Lin,\*<sup>b</sup> Gang Pang,<sup>a,c</sup> Longhai Zhang,<sup>a</sup> Lin Lian<sup>a</sup> and Xiaogang Zhang<sup>c</sup>*

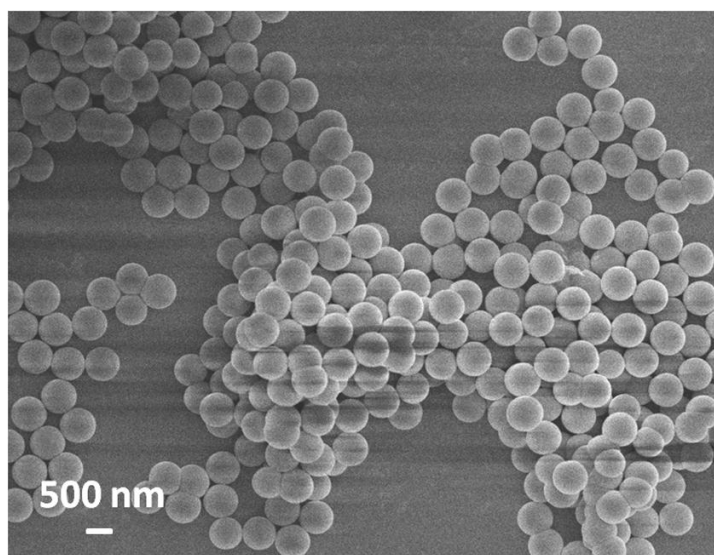

**Fig. S1** FESEM image of the obtained silica spheres

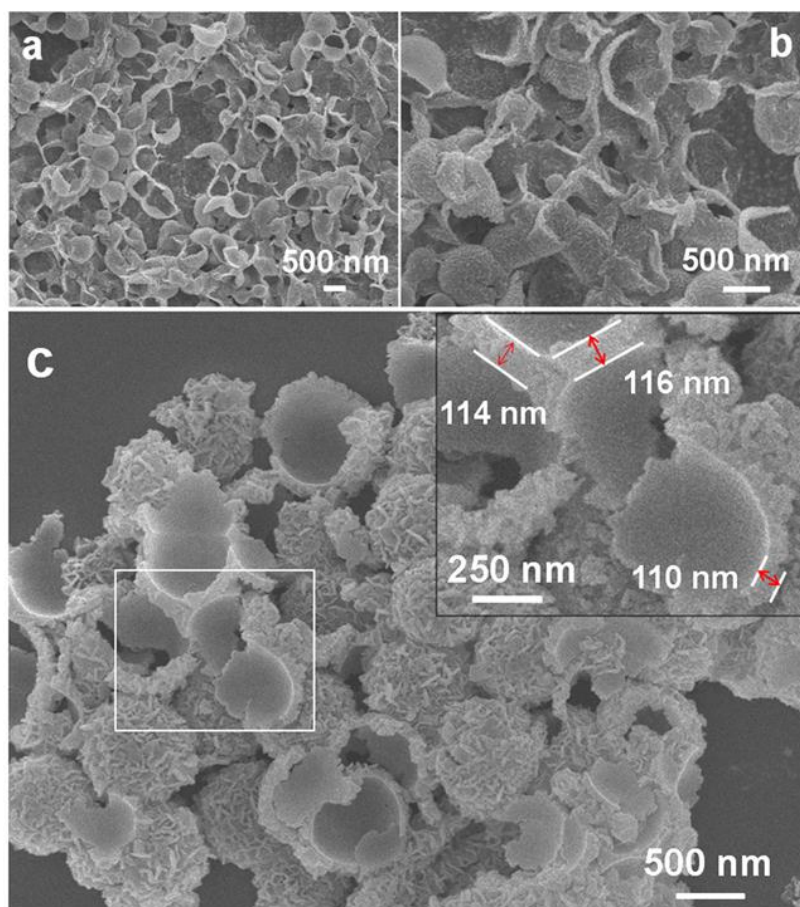

**Fig. S2** FESEM images of (a, b) NiCo<sub>2</sub>O<sub>4</sub>-1 and (c) NiCo<sub>2</sub>O<sub>4</sub>-2 samples. The inset in panel c is for the enlarged area indicated by the white rectangle in panel c

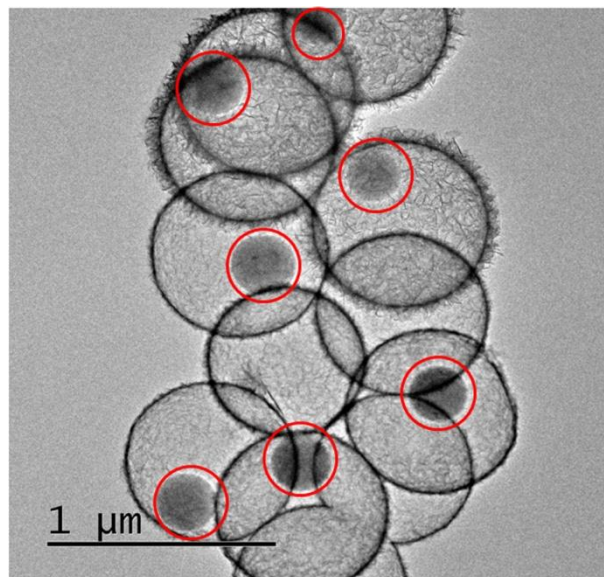

**Fig. S3** TEM image of the  $\text{NiCo}_2\text{O}_4$  sample obtained after stirred in 2 M NaOH at RT for 20 h

As seen in Fig. S3, after stirred for 20 h, the silica template still can be found, as indicated by the red circles in Fig. S3.

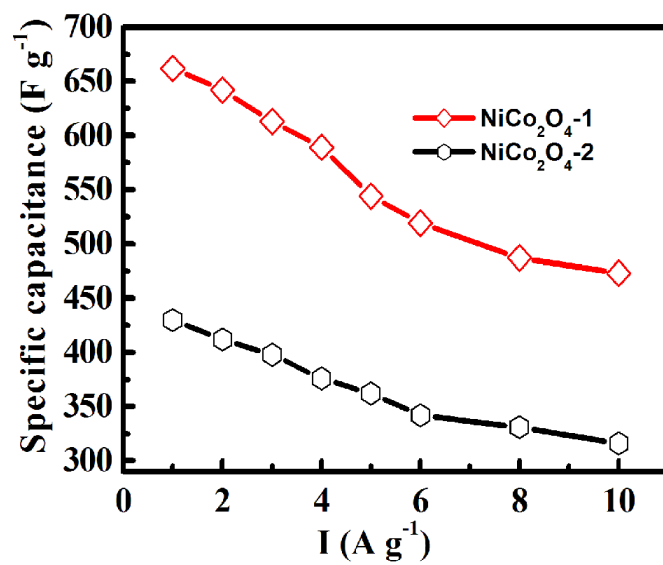

**Fig. S4** Calculated SCs of the NiCo<sub>2</sub>O<sub>4</sub>-1 and NiCo<sub>2</sub>O<sub>4</sub>-2 samples at different current densities as indicated
